# Supplementary material for: Unlocking the potential of a novel hierarchical hybrid (Ni–Co)Se2@NiMoO4@rGO–NF core–shell electrode for high-performance hybrid supercapacitors
Source: Royal Society of Chemistry journal article supplement (doi:10.1039/d1ta11063b), 2022-01-01
Supplement: d1ta11063b1.pdf [file d1ta11063b1.pdf]

## **Supporting Information**

### **Unlocking the potential of novel hierarchical hybrid (Ni-Co)Se<sub>2</sub>@NiMoO<sub>4</sub>@rGO-NF core-shell electrode for high-performance hybrid supercapacitors**

**Jiwan Acharya<sup>a,b</sup>, Bishweshwar Pant<sup>a,b</sup>, Gunendra Prasad Ojha<sup>a,b</sup>, Mira Park<sup>a,b\*</sup>**

<sup>a</sup>Carbon Composite Energy Nanomaterials Research Center, Woosuk University, Wanju, Chonbuk,  
55338, Republic of Korea

<sup>b</sup>Woosuk Institute of Smart Convergence Life Care (WSCLC), Woosuk University, Wanju, Chonbuk,  
55338, Republic of Korea

\*Corresponding author:

Mira Park, E-mail: [wonderfulmira@woosuk.ac.kr](mailto:wonderfulmira@woosuk.ac.kr)

Figure S1

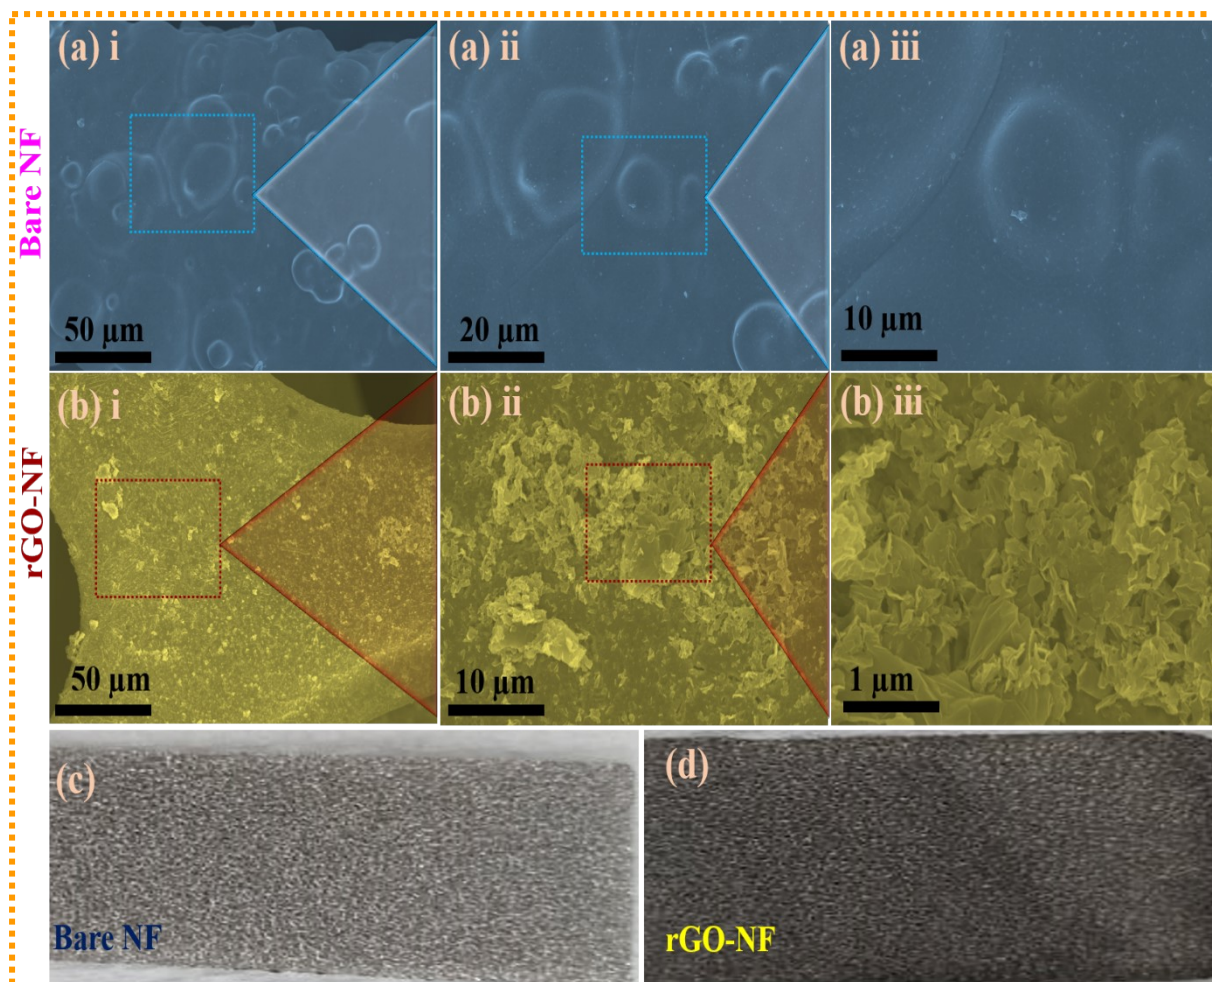

Fig. S1. FESEM images (ai-iii) bare Ni foam, (bi-iii) rGO-NF, digital images of (c) Bare NF, and (d) rGO-NF.

Figure S2

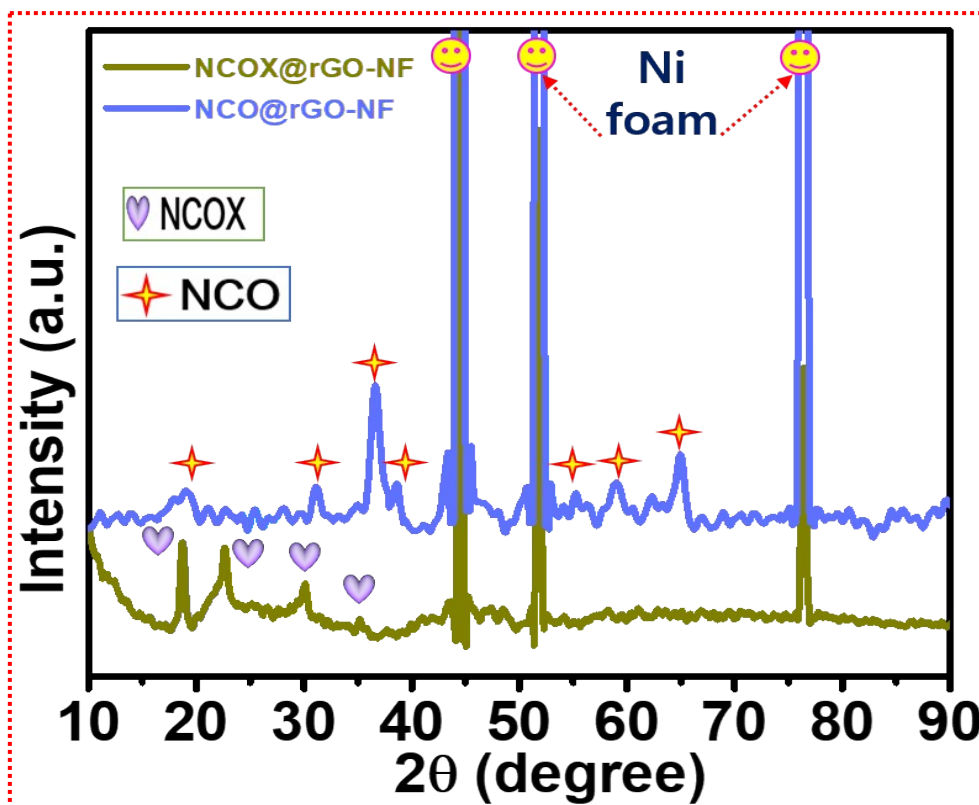

Fig. S2. XRD profile of NCO<sub>x</sub>@rGO-NF.

Figure S3

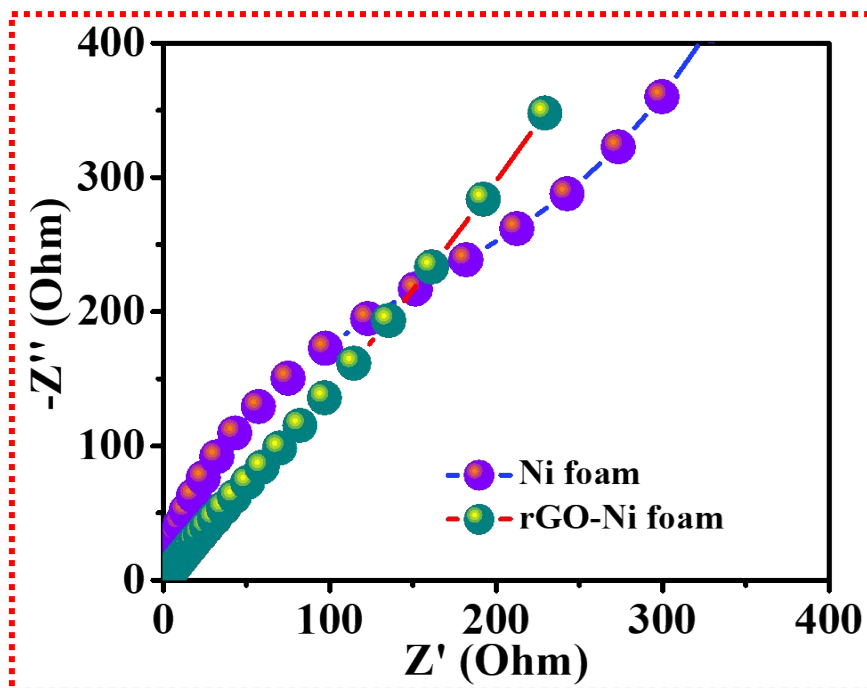

Fig. S3. EIS of bare NF and rGO-NF.

Figure S4

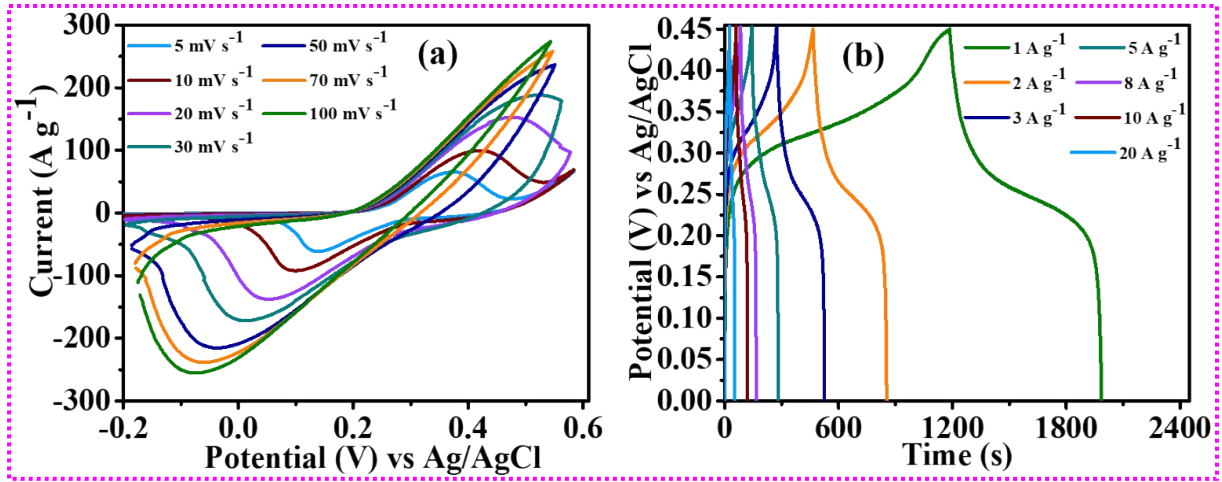

Fig. S4. (a) CV, and (b) GCD profiles of NCSe@rGO-NF.

Figure S5

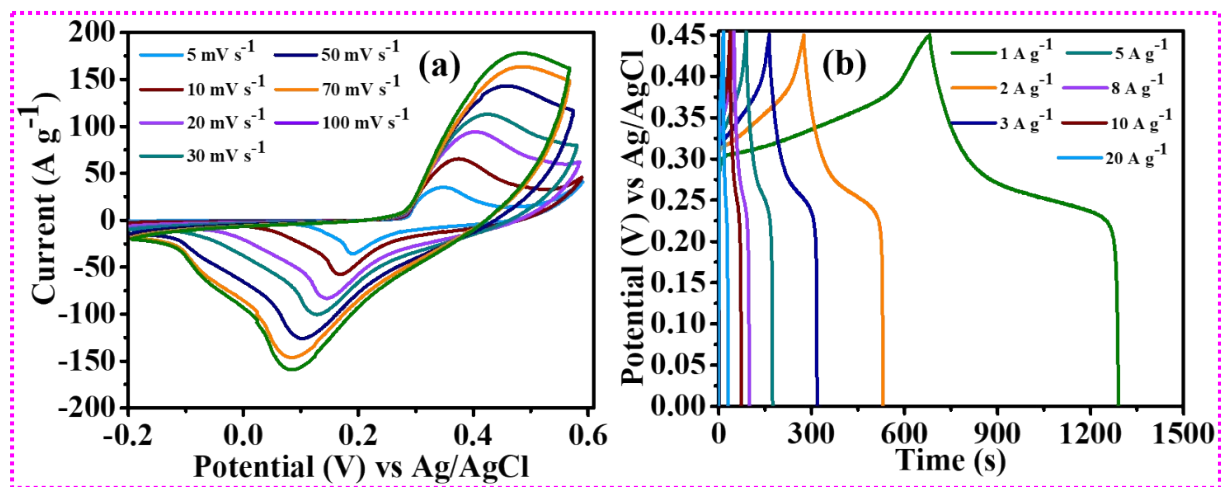

Fig. S5. (a) CV, and (b) GCD profiles of NMO@rGO-NF.

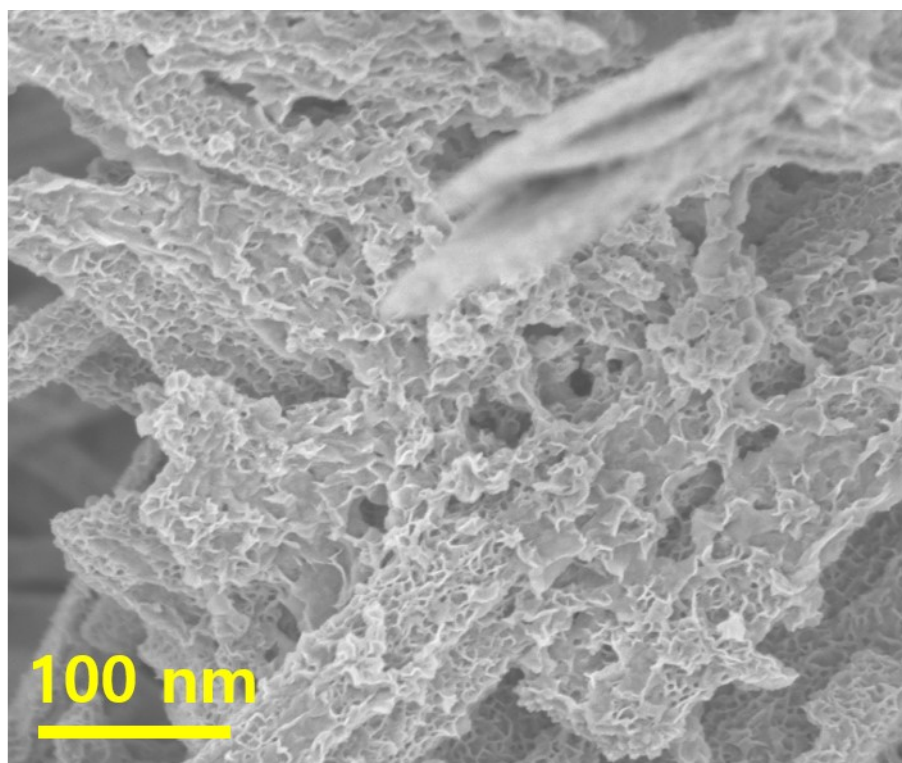

**Fig. S6. FESEM image of NCSe@NMO@rGO-NF after consecutive 8000 GCD cycles.**
